# Supplementary material for: Anti-Mycoplasma Activity of Bacilotetrins C–E, Cyclic Lipodepsipeptides from the Marine-Derived Bacillus subtilis and Structure Revision of Bacilotetrins A and B
Source: MDPI journal article supplement (doi:10.3390/md19100528), 2021-09-22
Supplement: s1 [file s1]

# Anti-Mycoplasma Activity of Bacilotetrins C–E, Cyclic Lipodepsipeptides from the Marine-Derived *Bacillus subtilis* and Structure Revision of Bacilotetrins A and B

Hwa-Sun Lee and Hee Jae Shin \*

Marine Natural Products Chemistry Laboratory, Korea Institute of Ocean Science & Technology, 385 Haeyang-ro, Yeongdo-gu, Busan 49111, Korea; hwasunlee@kiost.ac.kr

\* Correspondence: shinhj@kiost.ac.kr; Tel.: +82-51-664-3341

|             | Contents                                                                         | Page |
|-------------|----------------------------------------------------------------------------------|------|
| Figure S1.  | <sup>1</sup> H NMR spectrum of compound <b>1</b> (600 MHz, CD <sub>3</sub> OH).  | S3   |
| Figure S2.  | <sup>13</sup> C NMR spectrum of compound <b>1</b> (150 MHz, CD <sub>3</sub> OH). | S3   |
| Figure S3.  | HSQC spectrum of compound <b>1</b> in CD <sub>3</sub> OH.                        | S4   |
| Figure S4.  | COSY spectrum of compound <b>1</b> in CD <sub>3</sub> OH.                        | S4   |
| Figure S5.  | TOCSY spectrum of compound <b>1</b> in CD <sub>3</sub> OH.                       | S5   |
| Figure S6.  | HMBC spectrum of compound <b>1</b> in CD <sub>3</sub> OH.                        | S5   |
| Figure S7.  | NOESY spectrum of compound <b>1</b> in CD <sub>3</sub> OH.                       | S6   |
| Figure S8.  | HR-ESIMS spectrum of compound <b>1</b> .                                         | S7   |
| Figure S9.  | <sup>1</sup> H NMR spectrum of compound <b>2</b> (600 MHz, CD <sub>3</sub> OH).  | S8   |
| Figure S10. | <sup>13</sup> C NMR spectrum of compound <b>2</b> (150 MHz, CD <sub>3</sub> OH). | S8   |
| Figure S11. | HSQC spectrum of compound <b>2</b> in CD <sub>3</sub> OH.                        | S9   |
| Figure S12. | COSY spectrum of compound <b>2</b> in CD <sub>3</sub> OH.                        | S9   |
| Figure S13. | TOCSY spectrum of compound <b>2</b> in CD <sub>3</sub> OH.                       | S10  |
| Figure S14. | HMBC spectrum of compound <b>2</b> in CD <sub>3</sub> OH.                        | S10  |
| Figure S15. | ROESY spectrum of compound <b>2</b> in CD <sub>3</sub> OH.                       | S11  |
| Figure S16. | HR-ESIMS spectrum of compound <b>2</b> .                                         | S12  |

| Contents                                                                                                                                          | Page |
|---------------------------------------------------------------------------------------------------------------------------------------------------|------|
| Figure S17. <sup>1</sup> H NMR spectrum of compound <b>3</b> (600 MHz, CD <sub>3</sub> OH).                                                       | S13  |
| Figure S18. <sup>13</sup> C NMR spectrum of compound <b>3</b> (150 MHz, CD <sub>3</sub> OH).                                                      | S13  |
| Figure S19. HSQC spectrum of compound <b>3</b> in CD <sub>3</sub> OH.                                                                             | S14  |
| Figure S20. COSY spectrum of compound <b>3</b> in CD <sub>3</sub> OH.                                                                             | S14  |
| Figure S21. TOCSY spectrum of compound <b>3</b> in CD <sub>3</sub> OH.                                                                            | S15  |
| Figure S22. HMBC spectrum of compound <b>3</b> in CD <sub>3</sub> OH.                                                                             | S15  |
| Figure S23. ROESY spectrum of compound <b>3</b> in CD <sub>3</sub> OH.                                                                            | S16  |
| Figure S24. HR-ESIMS spectrum of compound <b>3</b> .                                                                                              | S17  |
| Figure S25. HPLC analysis of amino acids in <b>1</b> through the total hydrolysis.                                                                | S18  |
| Table S1. Retention times ( <i>t<sub>R</sub></i> , min) of L-FDLA derivatives of the hydrolysate of <b>1</b>                                      | S18  |
| Figure S26. HPLC-VWD-MS chromatogram of the partial hydrolysate of <b>1</b> .                                                                     | S19  |
| Figure S27. HPLC analysis of L-FDLA derivatives of P1 and P3 hydrolysates.                                                                        | S19  |
| Table S2. Retention times ( <i>t<sub>R</sub></i> , min) of L-FDLA derivatives of P1 and P3 hydrolysates                                           | S19  |
| Figure S28. Structures of standard dipeptides.                                                                                                    | S20  |
| Figure S29. HPLC analysis of L-FDLA derivatives of P2.                                                                                            | S20  |
| Table S3. Retention times ( <i>t<sub>R</sub></i> , min) of L-FDLA derivatives of P2                                                               | S20  |
| Figure S30. <sup>1</sup> H NMR spectrum of the ( <i>S</i> )-MTPA ester ( <b>1b</b> ) (600 MHz, CDCl <sub>3</sub> ).                               | S21  |
| Figure S31. COSY spectrum of the ( <i>S</i> )-MTPA ester ( <b>1b</b> ) in CDCl <sub>3</sub> .                                                     | S21  |
| Figure S32. <sup>1</sup> H NMR spectrum of the ( <i>R</i> )-MTPA ester ( <b>1c</b> ) (600 MHz, CDCl <sub>3</sub> ).                               | S22  |
| Figure S33. COSY spectrum of the ( <i>R</i> )-MTPA ester ( <b>1c</b> ) in CDCl <sub>3</sub> .                                                     | S22  |
| Figure S34. LR-EIMS spectrum of <b>1a</b> .                                                                                                       | S23  |
| Figure S35. LR-EIMS spectrum of the ( <i>S</i> )-MTPA ester ( <b>1b</b> ).                                                                        | S23  |
| Figure S36. LR-EIMS spectrum of the ( <i>R</i> )-MTPA ester ( <b>1c</b> ).                                                                        | S23  |
| Figure S37. Plausible biosynthetic pathway of compounds <b>1–3</b> .                                                                              | S24  |
| Table S4. <sup>1</sup> H and <sup>13</sup> C NMR data for data for reported and revised bacilotetrin A ( <b>4</b> ) (500 MHz, CD <sub>3</sub> OD) | S25  |

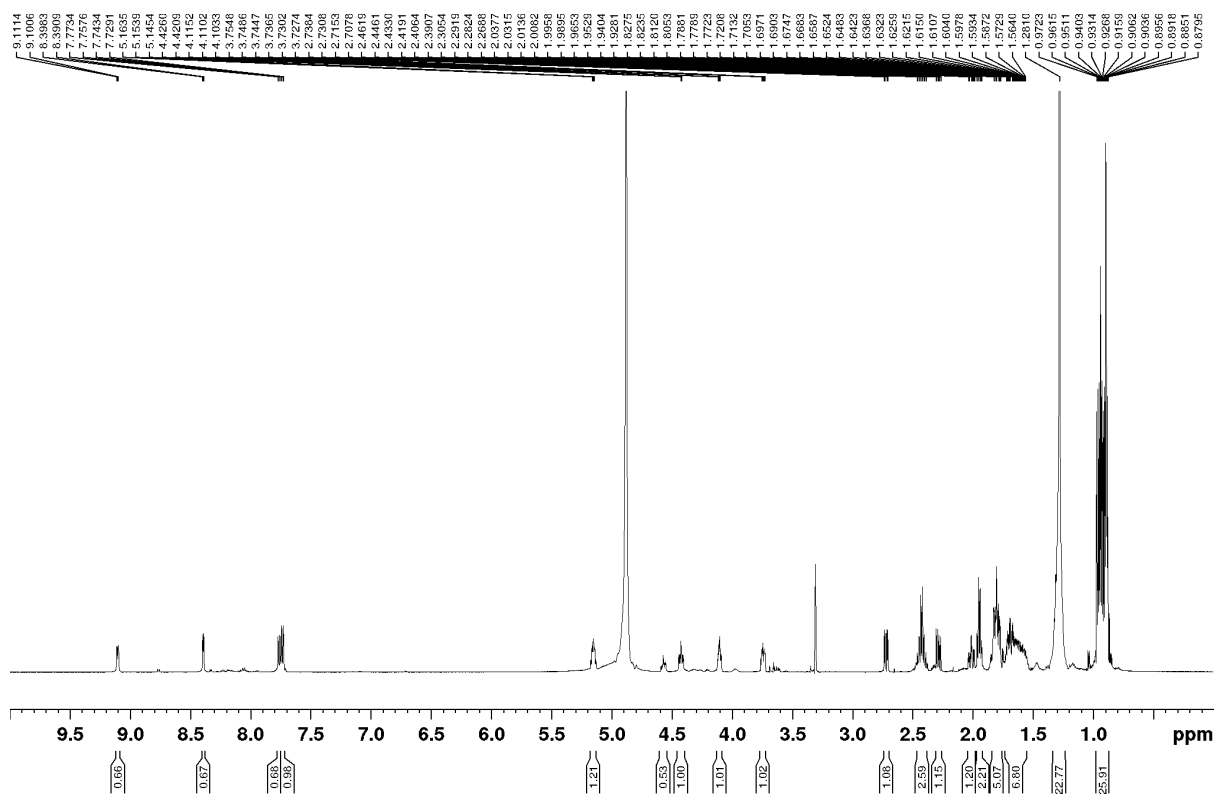

**Figure S1.** <sup>1</sup>H NMR spectrum of compound 1 (600 MHz, CD<sub>3</sub>OH).

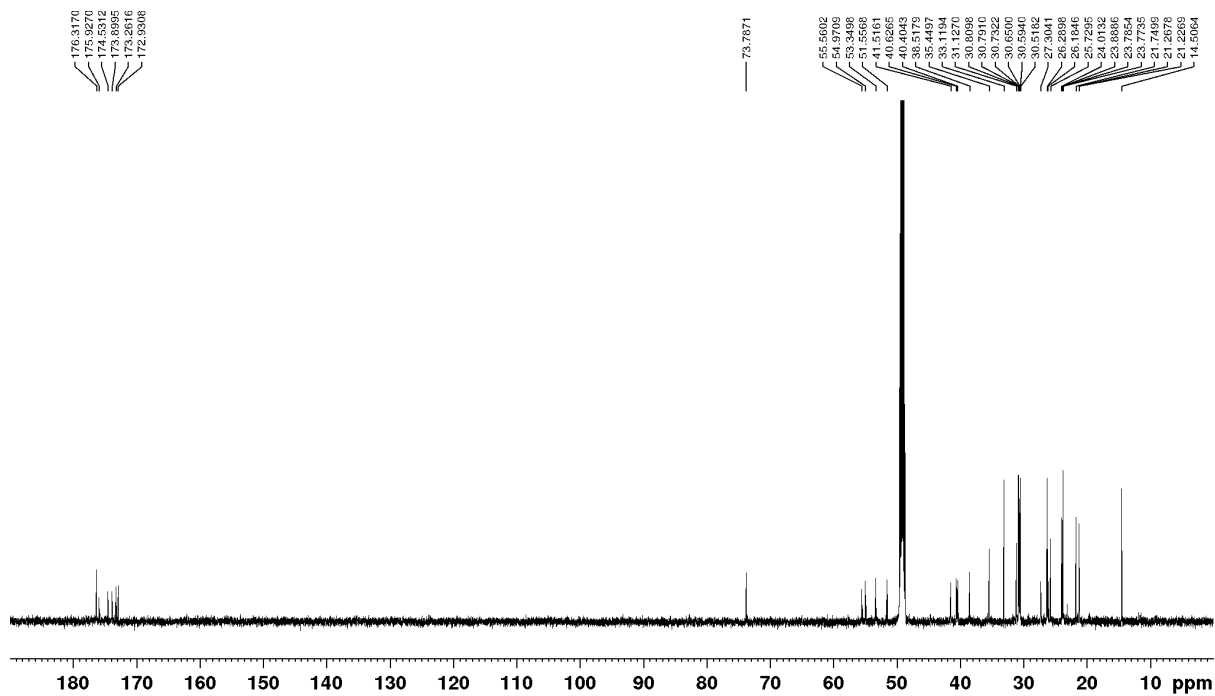

**Figure S2.** <sup>13</sup>C NMR spectrum of compound 1 (150 MHz, CD<sub>3</sub>OH).

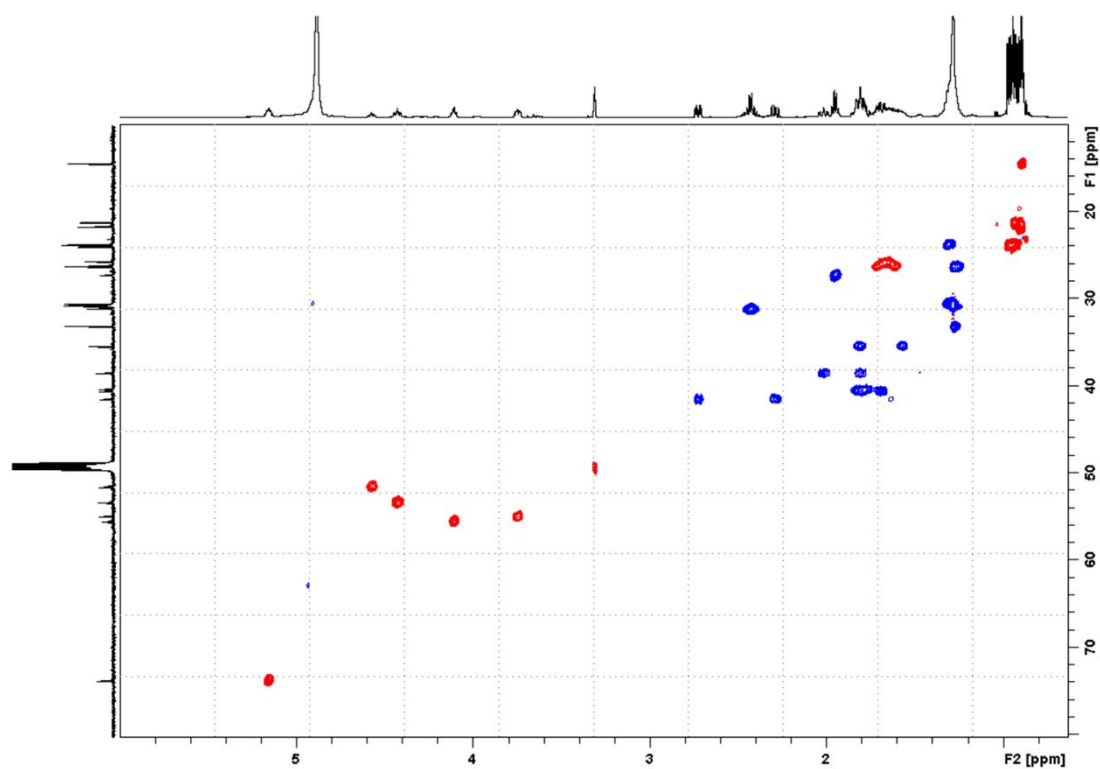

**Figure S3.** HSQC spectrum of compound **1** in CD<sub>3</sub>OH.

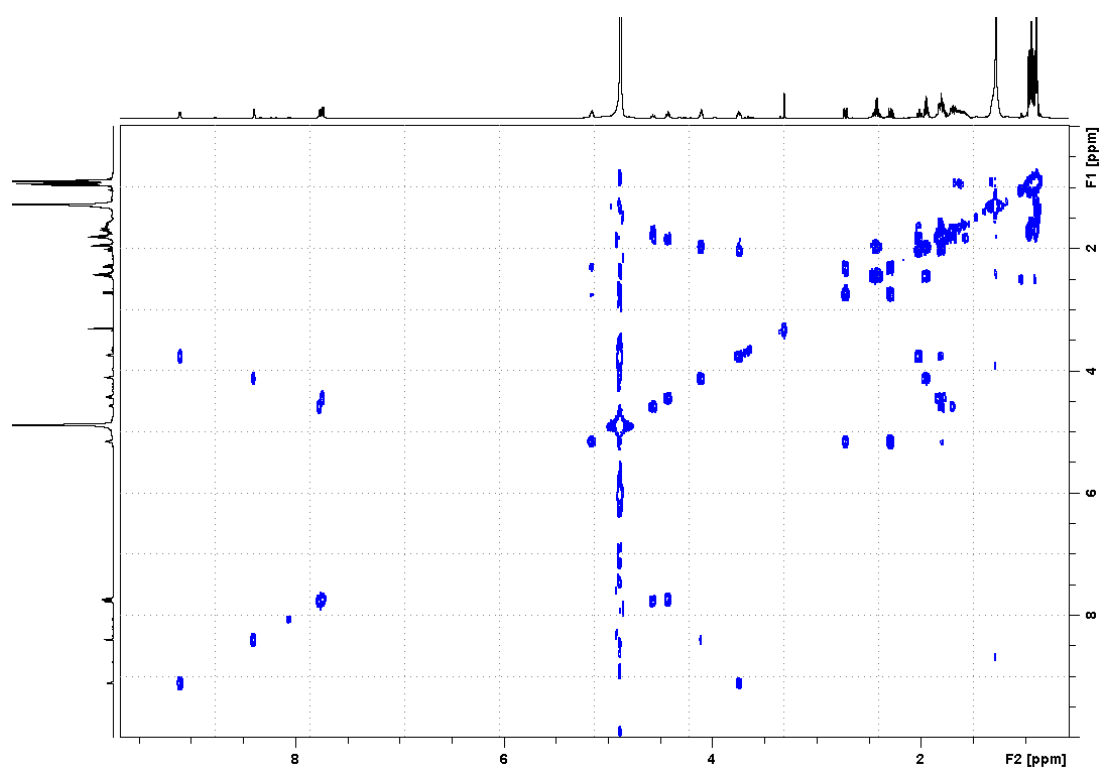

**Figure S4.** COSY spectrum of compound **1** in CD<sub>3</sub>OH.

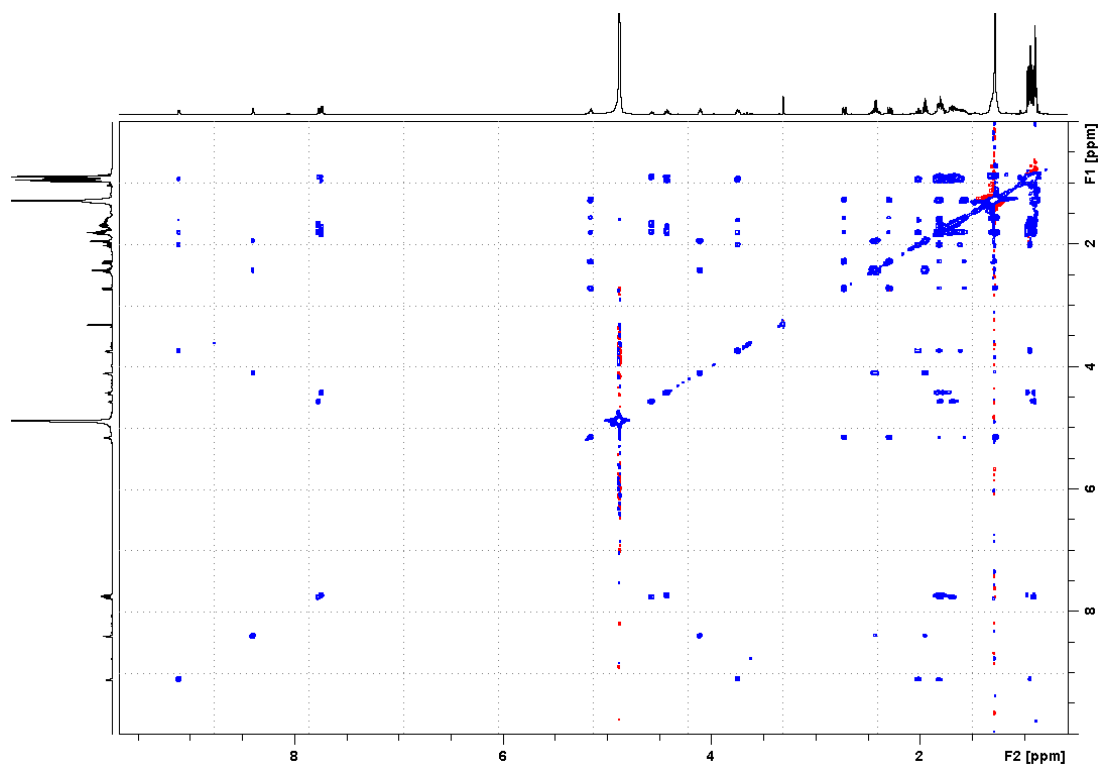

**Figure S5.** TOCSY spectrum of compound **1** in CD<sub>3</sub>OH.

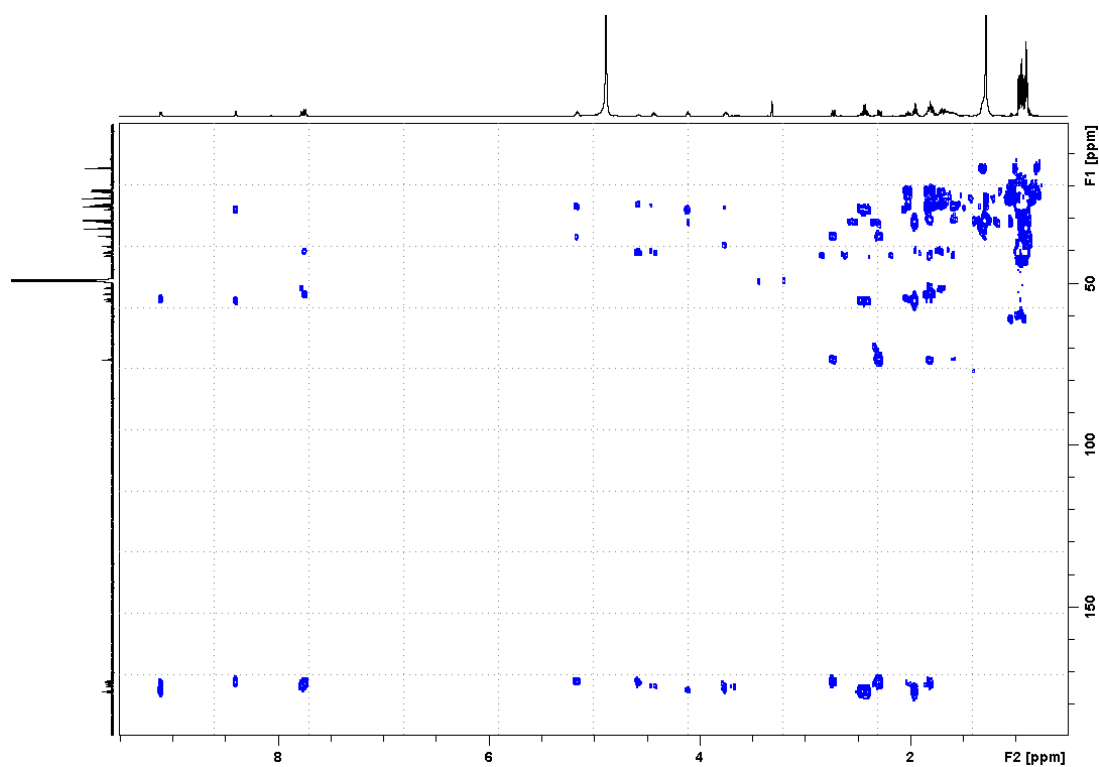

**Figure S6.** HMBC spectrum of compound **1** in CD<sub>3</sub>OH.

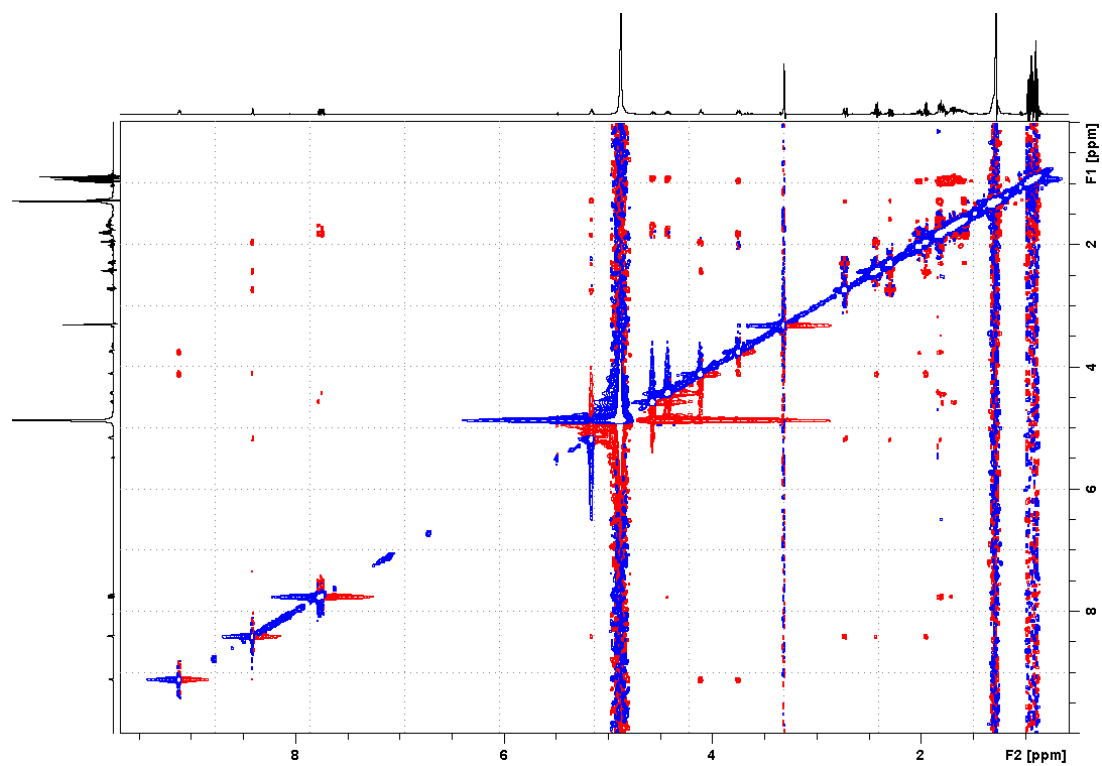

**Figure S7.** NOESY spectrum of compound **1** in CD<sub>3</sub>OH.

Range : 600-820 m/z

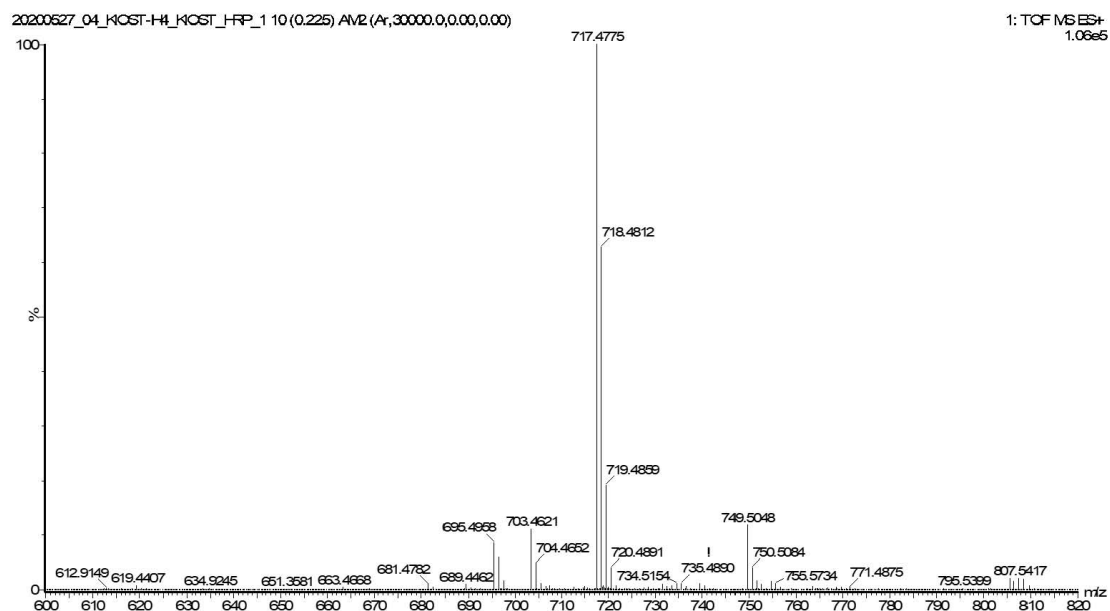

#### Elemental Composition Report

##### Single Mass Analysis

Tolerance = 5.0 PPM / DBE: min = -1.5, max = 100.0

Element prediction: Off

Number of isotope peaks used for i-FIT = 3

##### Monoisotopic Mass, Even Electron Ions

Elements Used:

C: 0-38 H: 0-70 N: 0-4 O: 0-8 Na: 0-1

Minimum: -1.5

Maximum: 100.0 5.0 100.0

| Mass     | Calc. Mass | mDa  | PPM  | DBE | i-FIT | Norm  | Conf(%) | Formula          |
|----------|------------|------|------|-----|-------|-------|---------|------------------|
| 695.4958 | 695.4959   | -0.1 | -0.1 | 6.5 | 267.1 | 0.117 | 88.94   | C37 H67 N4 O8    |
|          | 695.4935   | 2.3  | 3.3  | 3.5 | 269.2 | 2.202 | 11.06   | C35 H68 N4 O8 Na |
| 717.4775 | 717.4778   | -0.3 | -0.4 | 6.5 | 465.6 | n/a   | n/a     | C37 H68 N4 O8 Na |

**Figure S8.** HR-ESIMS spectrum of compound **1**.

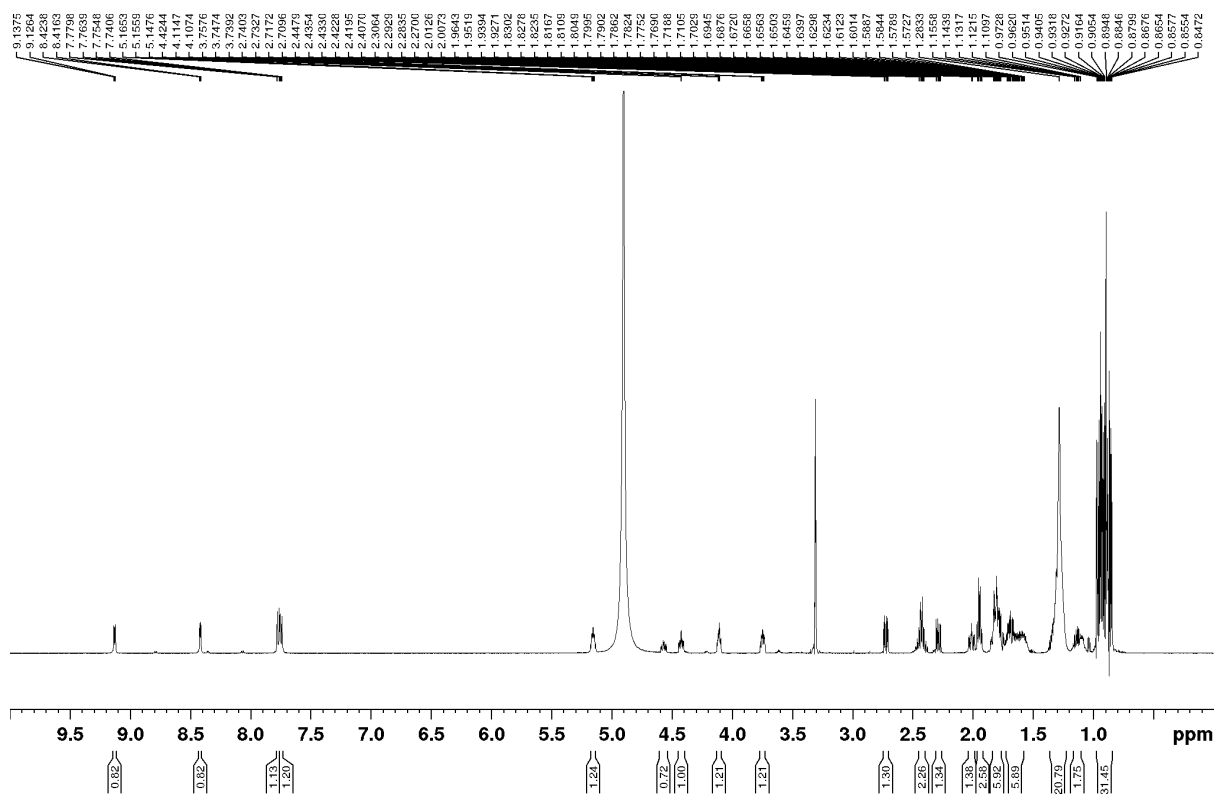

**Figure S9.** <sup>1</sup>H NMR spectrum of compound **2** (600 MHz, CD<sub>3</sub>OH).

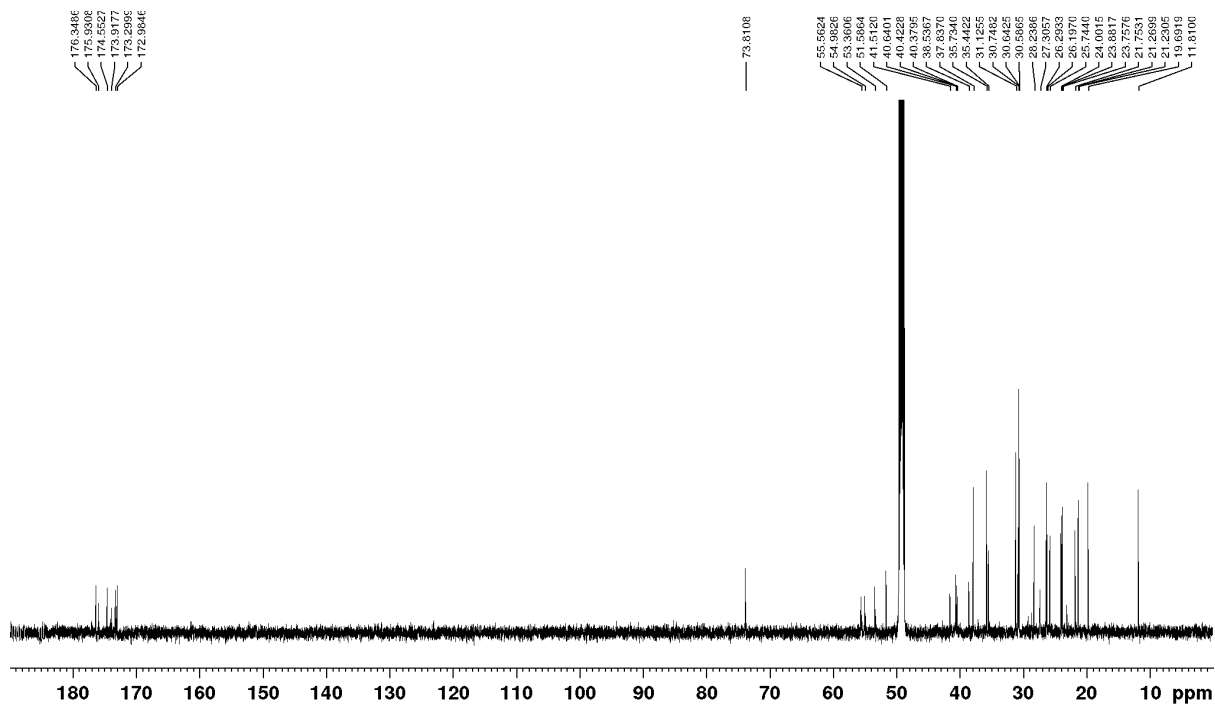

**Figure S10.** <sup>13</sup>C NMR spectrum of compound **2** (150 MHz, CD<sub>3</sub>OH).



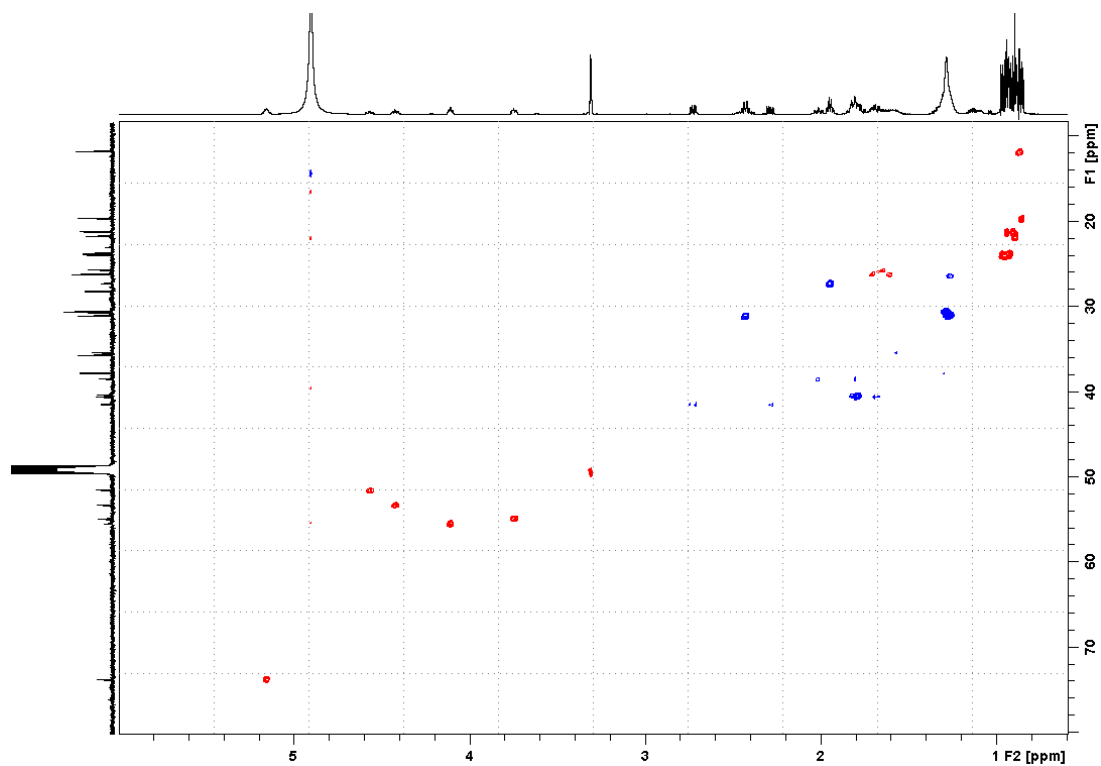

**Figure S11.** HSQC spectrum of compound **2** in CD<sub>3</sub>OH.

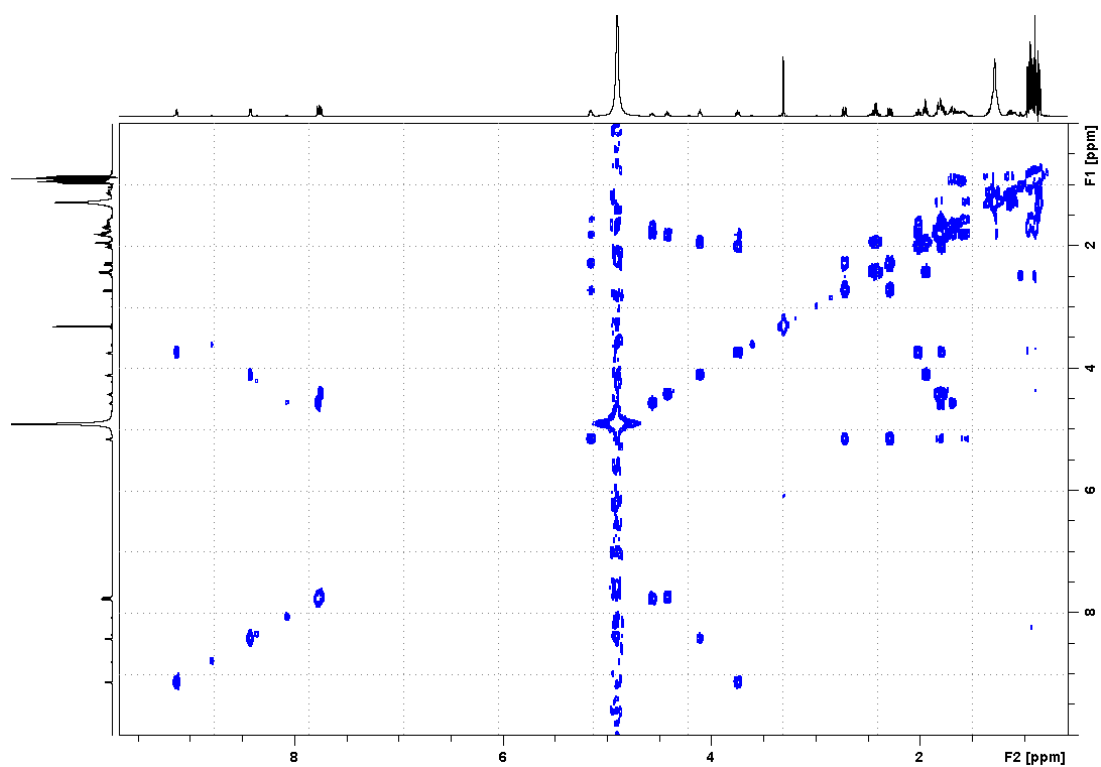

**Figure S12.** COSY spectrum of compound **2** in CD<sub>3</sub>OH.

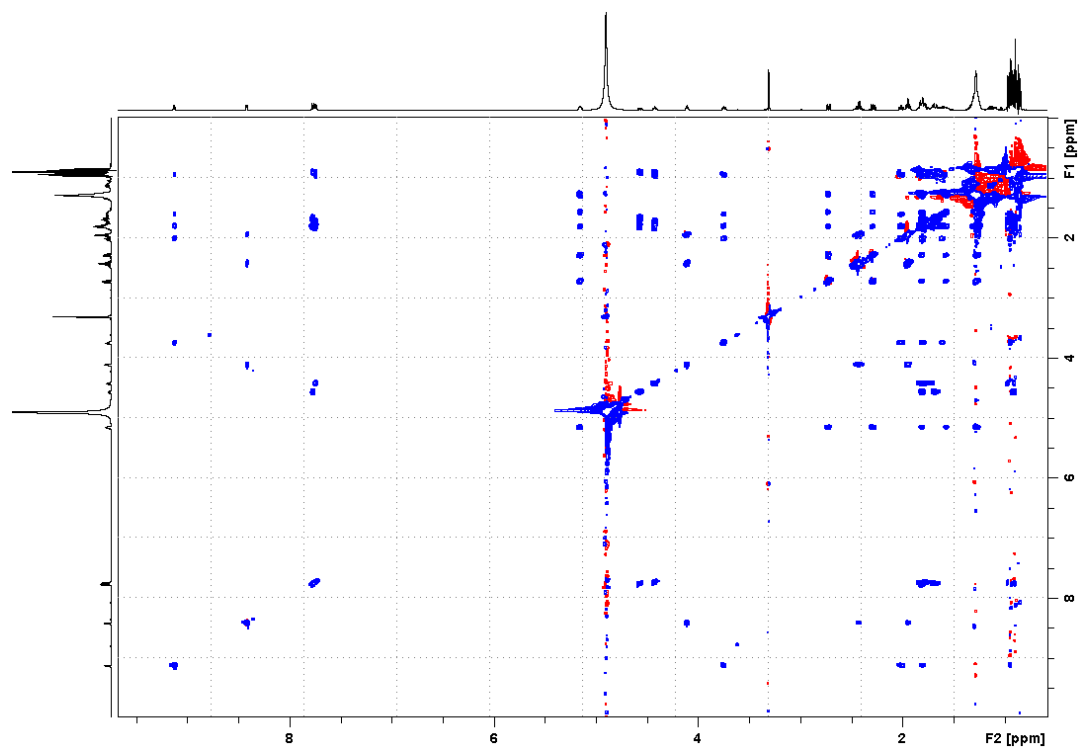

**Figure S13.** TOCSY spectrum of compound **2** in CD<sub>3</sub>OH.

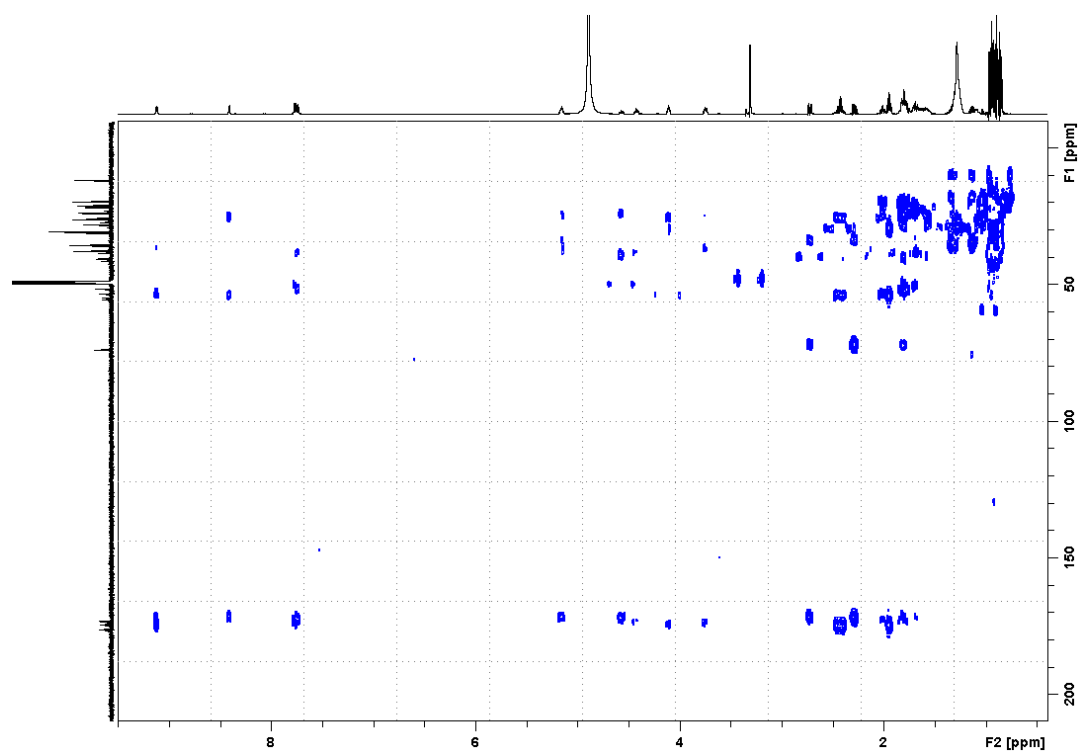

**Figure S14.** HMBC spectrum of compound **2** in CD<sub>3</sub>OH.

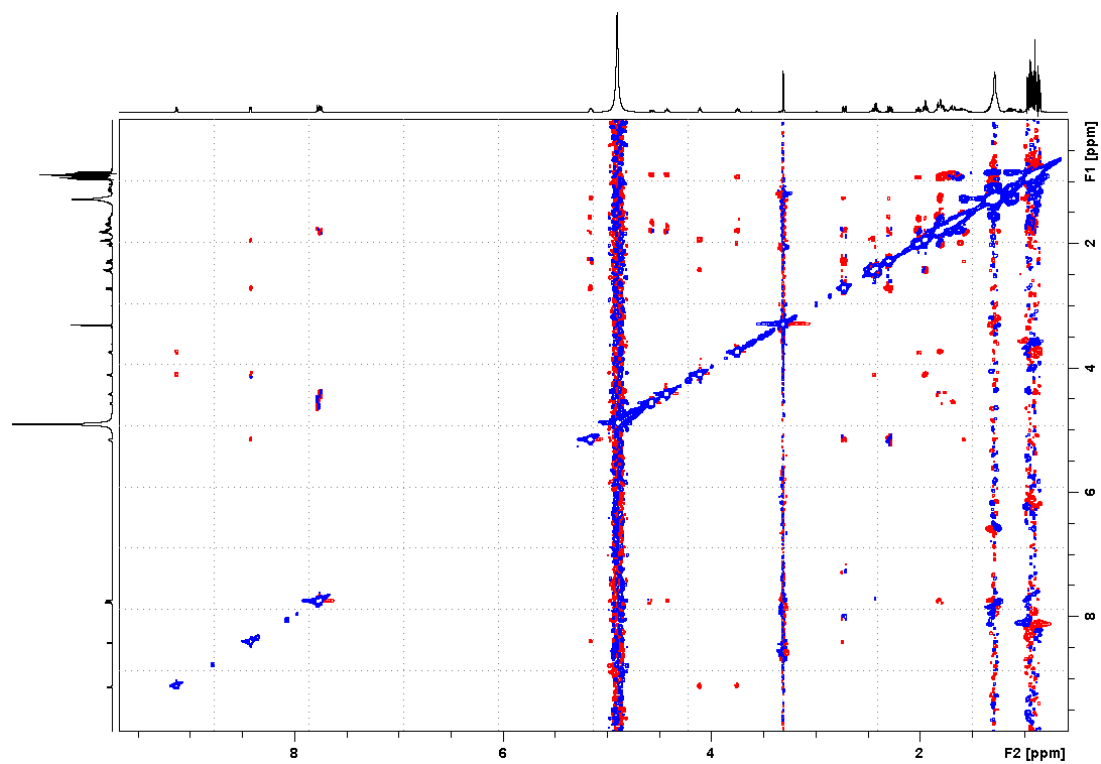

**Figure S15.** ROESY spectrum of compound **2** in CD<sub>3</sub>OH.

Sample : 03  
 (+) ESI-MS  
 Range : 50-1200 m/z

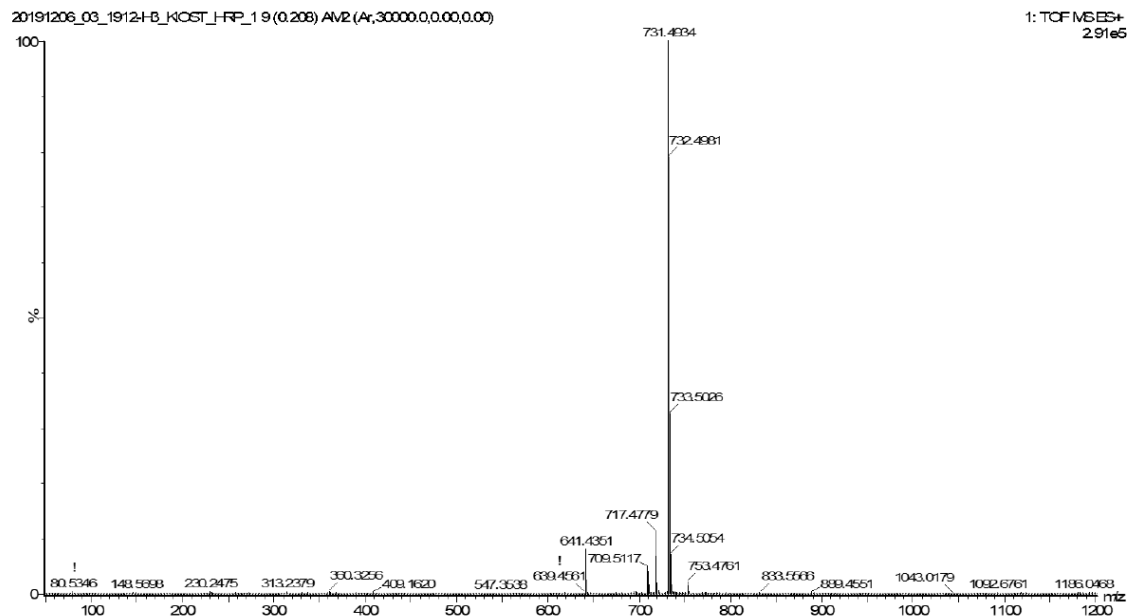

#### Elemental Composition Report

##### Single Mass Analysis

Tolerance = 5.0 PPM / DBE: min = -1.5, max = 100.0

Element prediction: Off

Number of isotope peaks used for i-FIT = 3

##### Monoisotopic Mass, Even Electron Ions

24 formula(e) evaluated with 2 results within limits (up to 100 closest results for each mass)

Elements Used:

C: 1-50 H: 1-70 N: 4-4 O: 8-9 Na: 0-1

Minimum:

Maximum: 100.0 5.0 100.0

| Mass     | Calc. Mass | mDa  | PPM  | DBE | i-FIT | Norm  | Conf(%) | Formula          |
|----------|------------|------|------|-----|-------|-------|---------|------------------|
| 731.4934 | 731.4935   | -0.1 | -0.1 | 6.5 | 638.4 | 0.898 | 40.74   | C38 H68 N4 O8 Na |
|          | 731.4959   | -2.5 | -3.4 | 9.5 | 638.1 | 0.523 | 59.26   | C40 H67 N4 O8    |

**Figure S16.** HR-ESIMS spectrum of compound **2**.

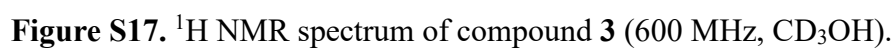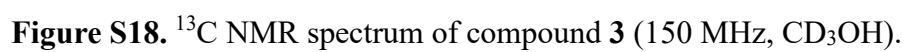

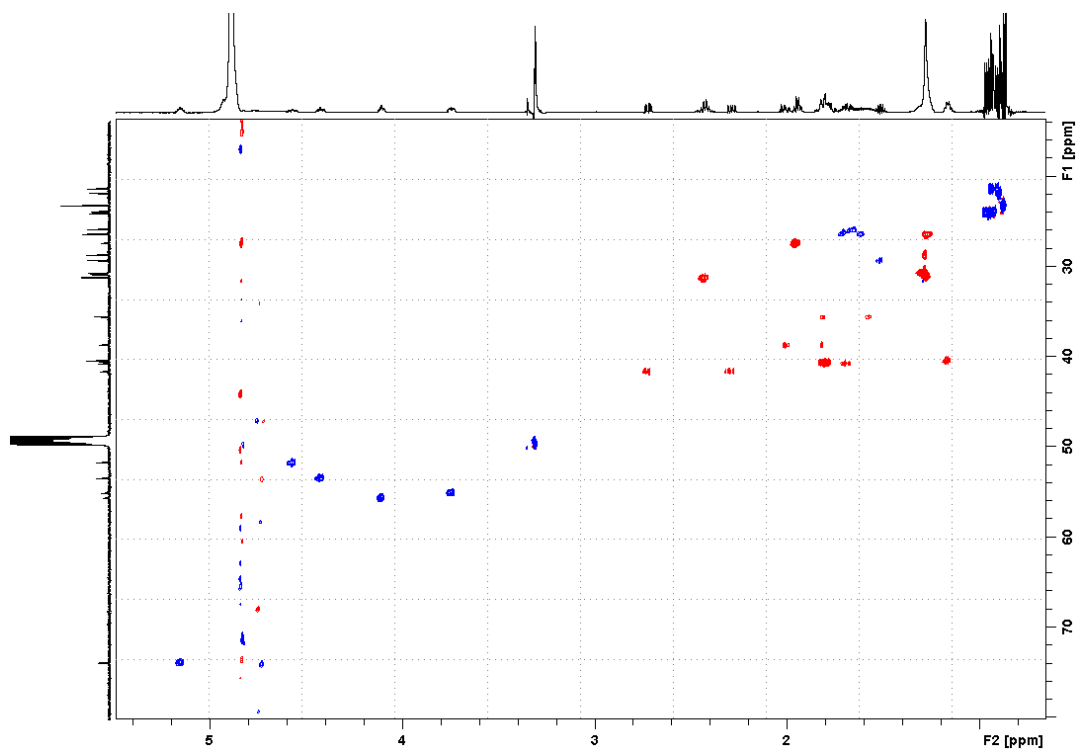

**Figure S19.** HSQC spectrum of compound **3** in CD<sub>3</sub>OH.

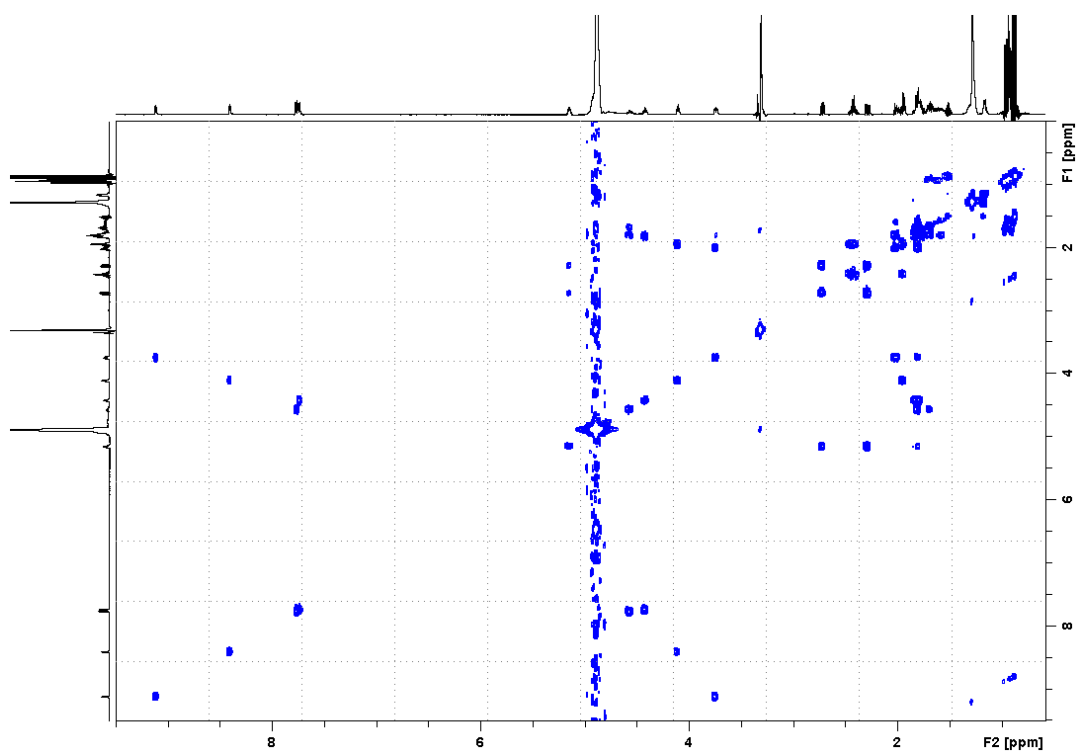

**Figure S20.** COSY spectrum of compound **3** in CD<sub>3</sub>OH.

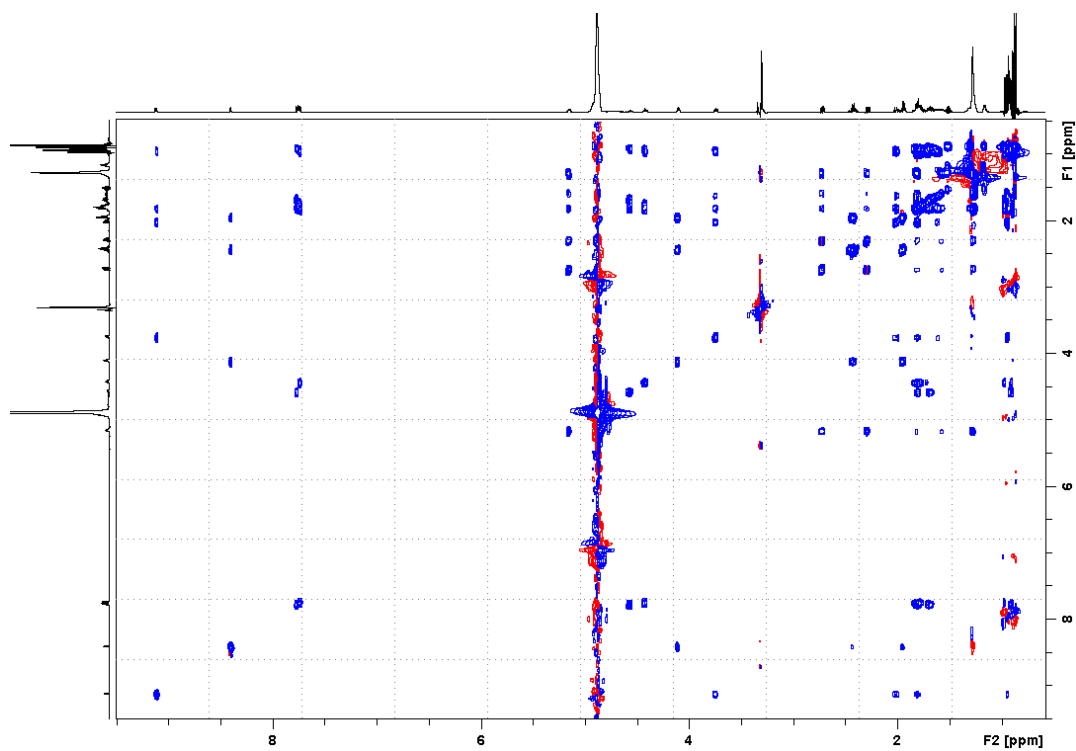

**Figure S21.** TOCSY spectrum of compound **3** in CD<sub>3</sub>OH.

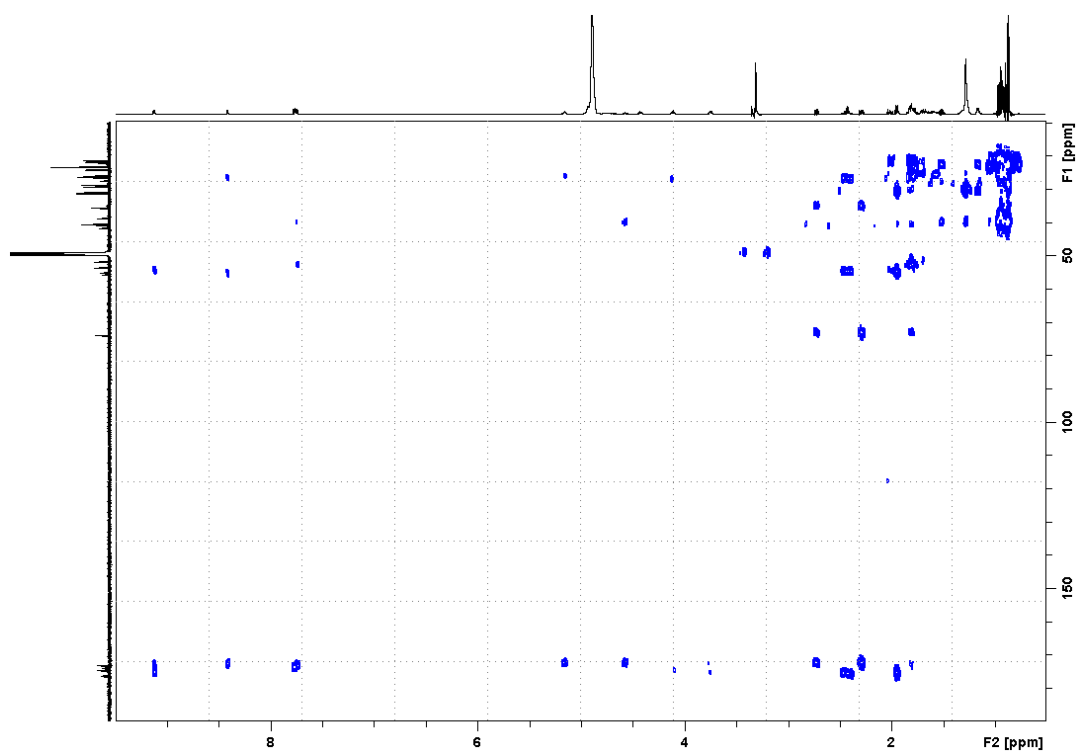

**Figure S22.** HMBC spectrum of compound **3** in CD<sub>3</sub>OH.

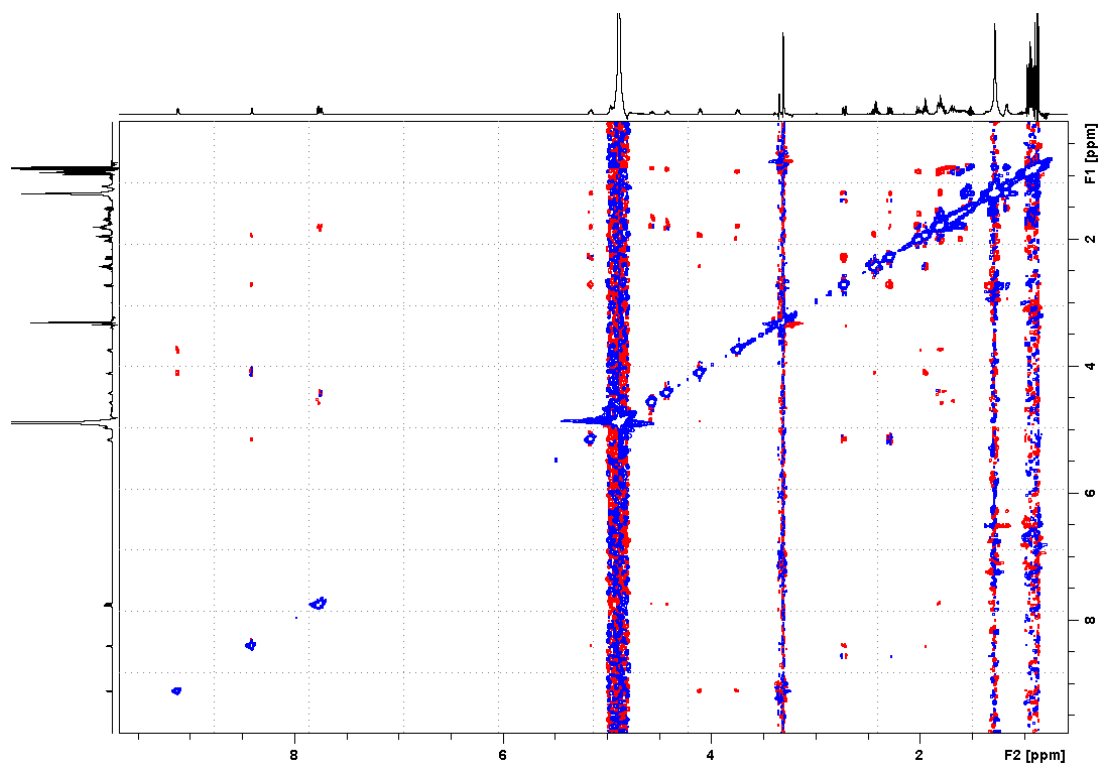

**Figure S23.** ROESY spectrum of compound **3** in CD<sub>3</sub>OH.



Sample : 04  
 (+) ESI-MS  
 Range : 50-1200 m/z

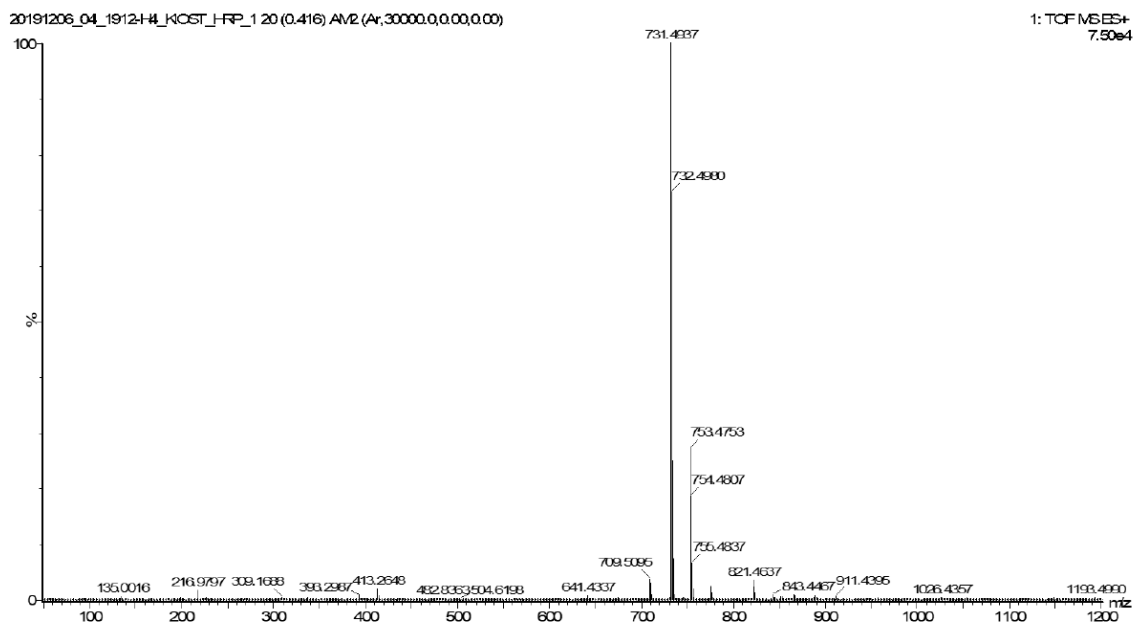

#### Elemental Composition Report

Single Mass Analysis  
 Tolerance = 5.0 PPM / DBE: min = -1.5, max = 100.0  
 Element prediction: Off  
 Number of isotope peaks used for i-FIT = 3

Monoisotopic Mass, Even Electron Ions  
 24 formula(e) evaluated with 2 results within limits (up to 100 closest results for each mass)

Elements Used:

C: 1-50 H: 1-70 N: 4-4 O: 8-9 Na: 0-1

Minimum: -1.5

Maximum: 100.0 5.0 100.0

| Mass     | Calc. Mass | mDa  | PPM  | DBE | i-FIT | Norm  | Conf(%) | Formula          |
|----------|------------|------|------|-----|-------|-------|---------|------------------|
| 731.4937 | 731.4935   | 0.2  | 0.3  | 6.5 | 511.5 | 0.833 | 43.48   | C38 H68 N4 O8 Na |
|          | 731.4959   | -2.2 | -3.0 | 9.5 | 511.3 | 0.571 | 56.52   | C40 H67 N4 O8    |

Figure S24. HR-ESIMS spectrum of compound 3.

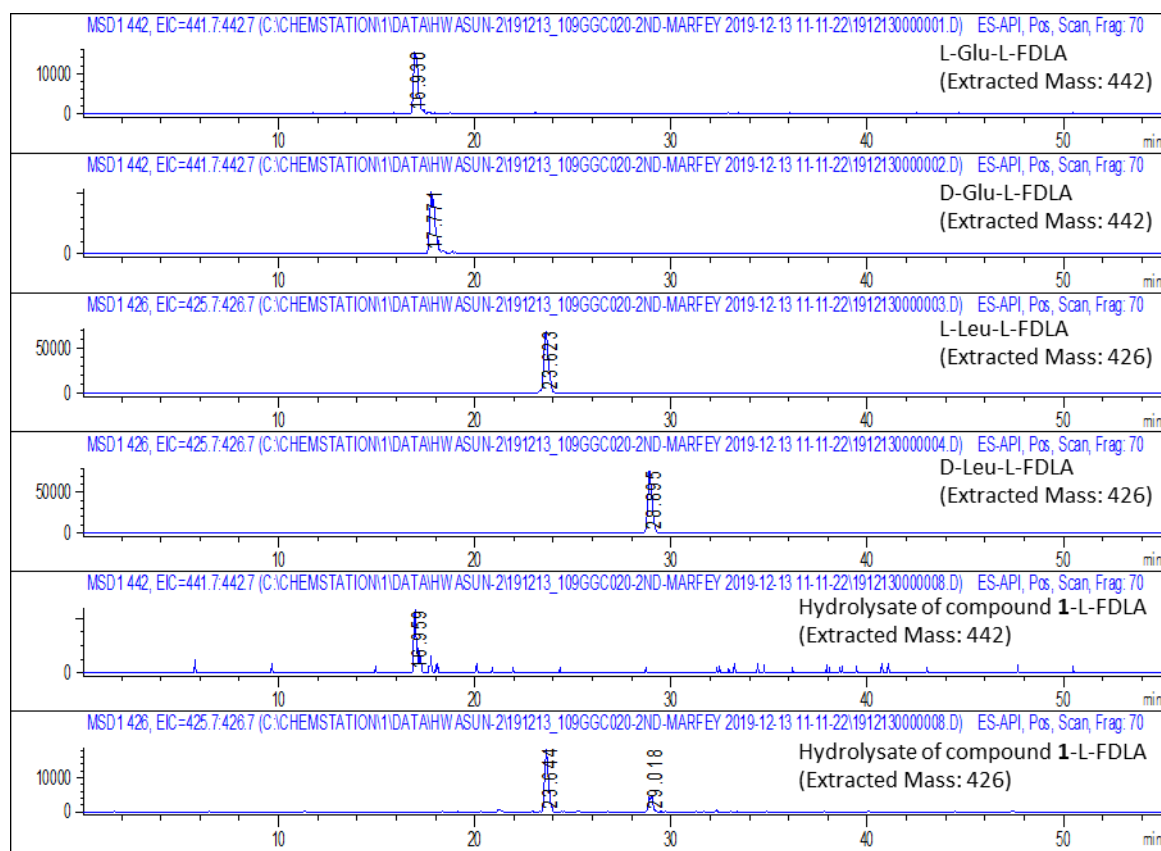

Extract ion mode, isolation condition: column: YMC ODS-A, 250 × 4.6 mm, 5 μm; flow rate: 0.5 mL/min; UV: 340 nm; gradient MeCN-H<sub>2</sub>O (+0.02% TFA) solvent system (40% MeCN for 5 min, 40–80% MeCN over 20 min and 80% MeCN

**Figure S25.** HPLC analysis of amino acids in **1** through the total hydrolysis.

**Table S1.** Retention times ( $t_R$ , min) of L-FDLA derivatives of the hydrolysate of **1**

| Amino acids | Detected $m/z$ | Hydrolysate of <b>1</b> | $t_R$ of standards |
|-------------|----------------|-------------------------|--------------------|
| L-Glu       | 442            | 16.9                    | 16.9               |
| D-Glu       | 442            | -                       | 17.8               |
| L-Leu       | 426            | 23.6                    | 23.6               |
| D-Leu       | 426            | 29.0                    | 28.9               |

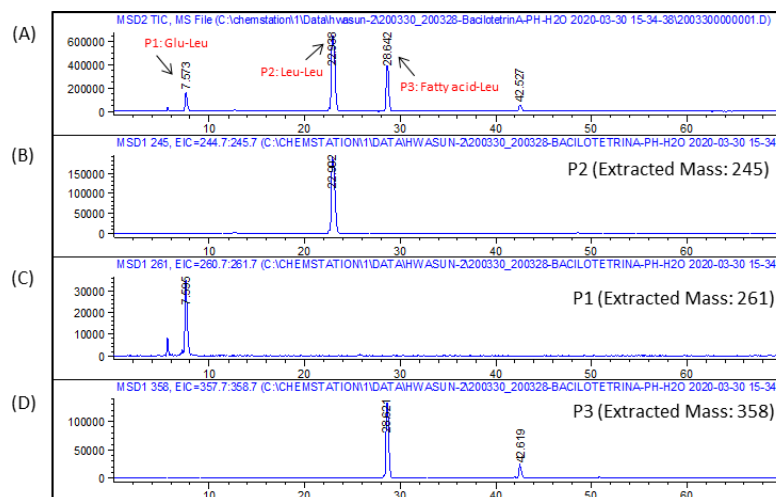

(A) SIM mode:  $m/z$  245, 261 and 358 (B) extracted mass ( $m/z$  245) of P2 (C) extracted mass ( $m/z$  261) of P1 (D) extracted mass ( $m/z$  358) of P3. Isolation condition: column: YMC ODS-A,  $250 \times 4.6$  mm,  $5 \mu\text{m}$ ; flow rate:  $0.5 \text{ mL/min}$ ; UV:  $224 \text{ nm}$ ; gradient MeCN- $\text{H}_2\text{O}$  ( $+0.02\%$  TFA) solvent system (20% MeCN for 10 min, 20–100% MeCN over 40 min and 100% MeCN for 10 min);

**Figure S26.** HPLC-VWD-MS chromatogram of the partial hydrolysates of **1**.

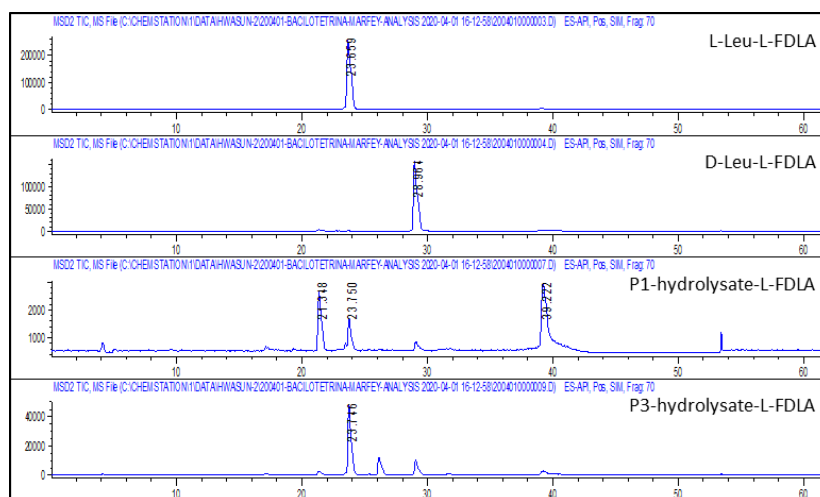

SIM mode:  $m/z$  426, Column: YMC ODS-A,  $250 \times 4.6$  mm,  $5 \mu\text{m}$ ; flow rate:  $0.5 \text{ mL/min}$ ; UV:  $340 \text{ nm}$ ; gradient MeCN- $\text{H}_2\text{O}$  ( $+0.02\%$  TFA) solvent system (40% MeCN for 5 min, 40–80% MeCN over 20 min and 80% MeCN for 5 min)

**Figure S27.** HPLC analysis of L-FDLA derivatives of P1 and P3 hydrolysates.

**Table S2.** Retention times ( $t_R$ , min) of L-FDLA derivatives of P1 and P3 hydrolysates

| Amino acids | Detected $m/z$ | P1 Hydrolysate | P3 Hydrolysate | $t_R$ of standards |
|-------------|----------------|----------------|----------------|--------------------|
| L-Leu       | 426            | 23.7           | 23.7           | 23.6               |
| D-Leu       | 426            | -              | -              | 29.0               |

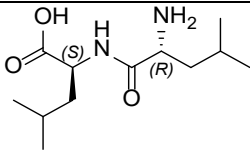

D-Leu-L-Leu



L-Leu-D-Leu

**Figure S28.** Structures of standard dipeptides.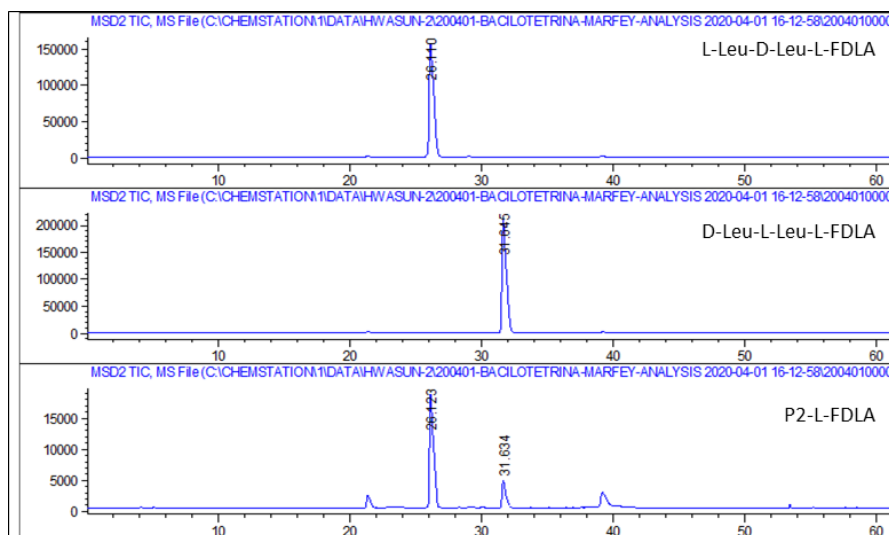

SIM mode:  $m/z$  589, Column: YMC ODS-A, 250 × 4.6 mm, 5  $\mu$ m; flow rate: 0.5 mL/min; UV: 340 nm; gradient MeCN- $H_2O$  (+0.02% TFA) solvent system (40% MeCN for 5 min, 40–80% MeCN over 20 min and 80% MeCN for 5 min)

**Figure S29.** HPLC analysis of L-FDLA derivatives of P2.**Table S3.** Retention times ( $t_R$ , min) of L-FDLA derivatives of P2

| Amino acids | Detected $m/z$ | P3   | $t_R$ of standards |
|-------------|----------------|------|--------------------|
| L-Leu-D-Leu | 589            | 26.1 | 26.1               |
| D-Leu-L-Leu | 589            | 31.6 | 31.6               |

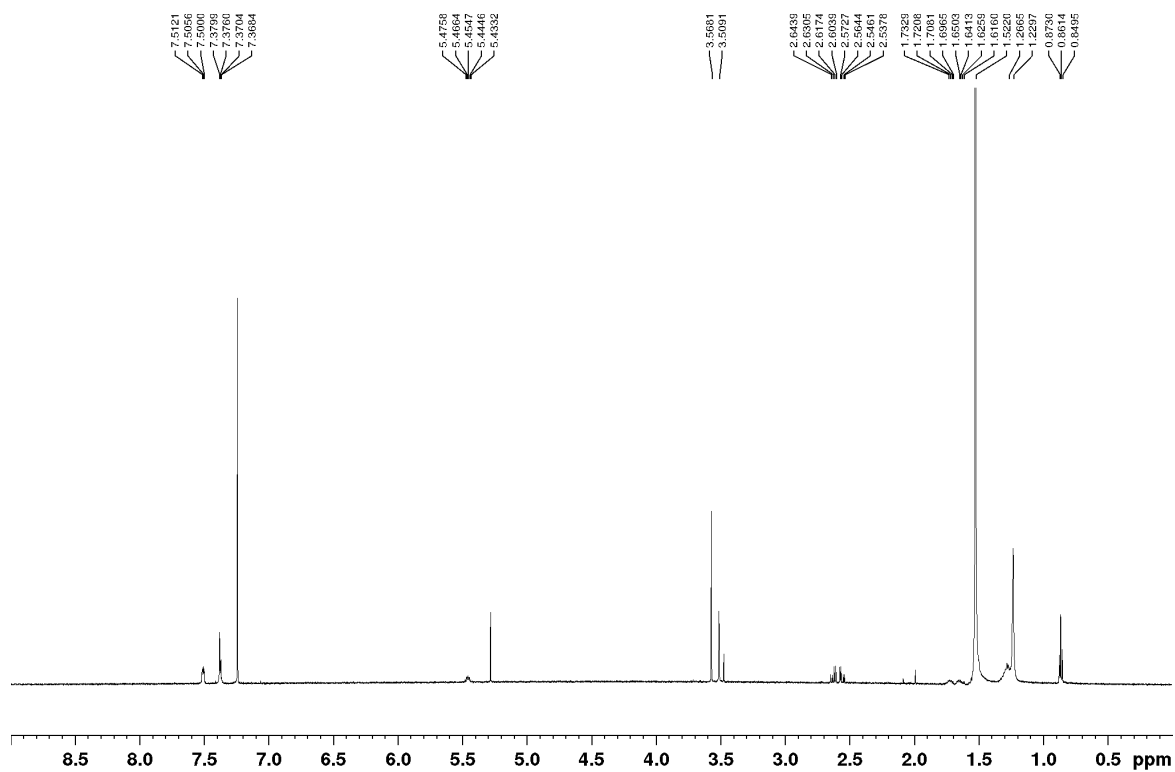

**Figure S30.**  $^1\text{H}$  NMR spectrum of the (*S*)-MTPA ester (**1b**) (600 MHz,  $\text{CDCl}_3$ ).

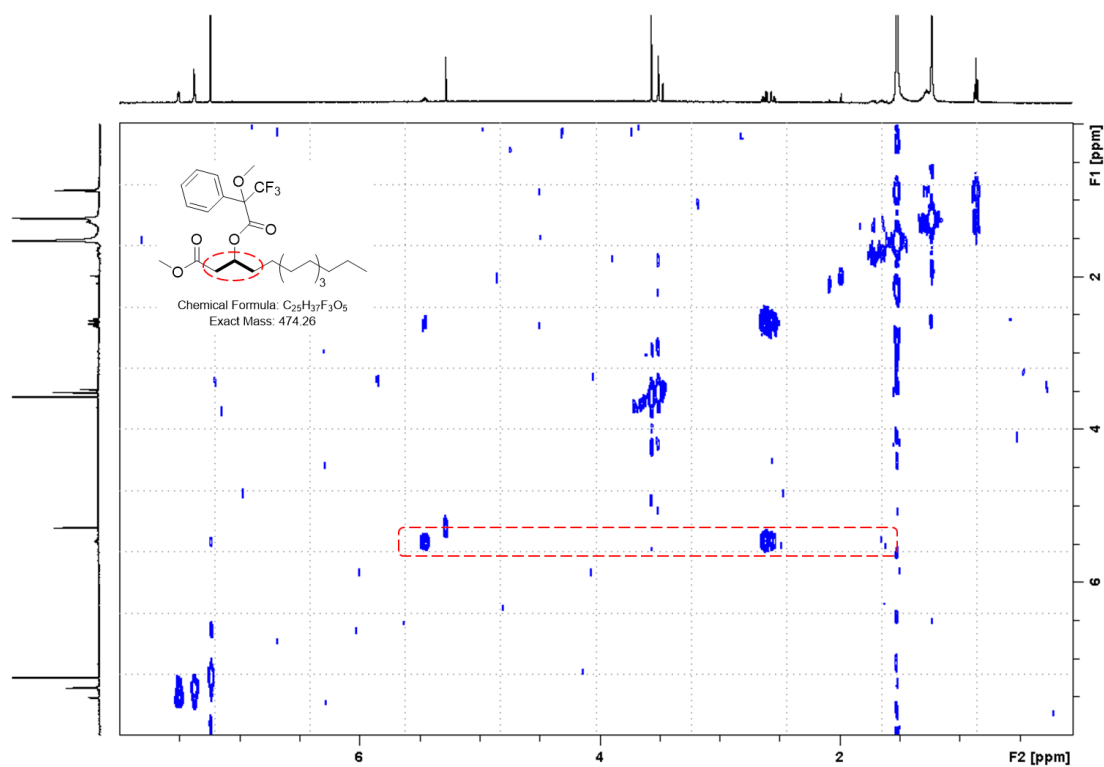

**Figure S31.** COSY spectrum of the (*S*)-MTPA ester (**1b**) in  $\text{CDCl}_3$ .

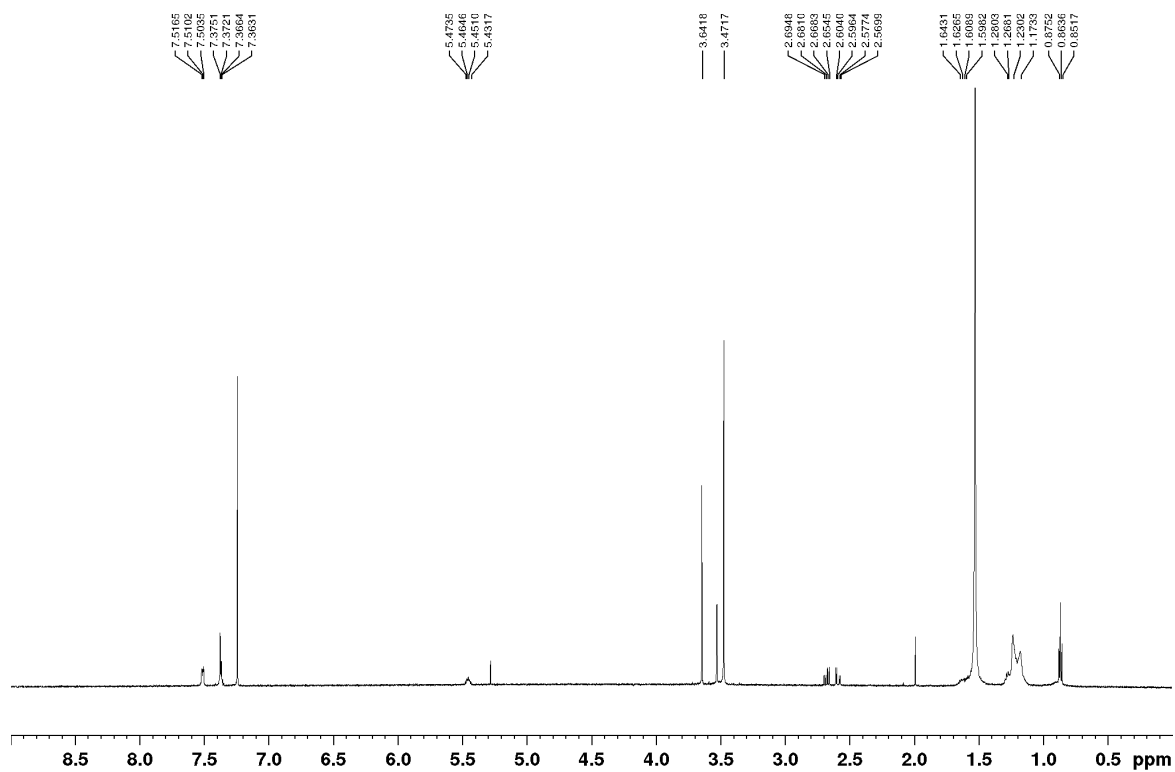

**Figure S32.**  $^1\text{H}$  NMR spectrum of the (*R*)-MTPA ester (**1c**) (600 MHz,  $\text{CDCl}_3$ ).

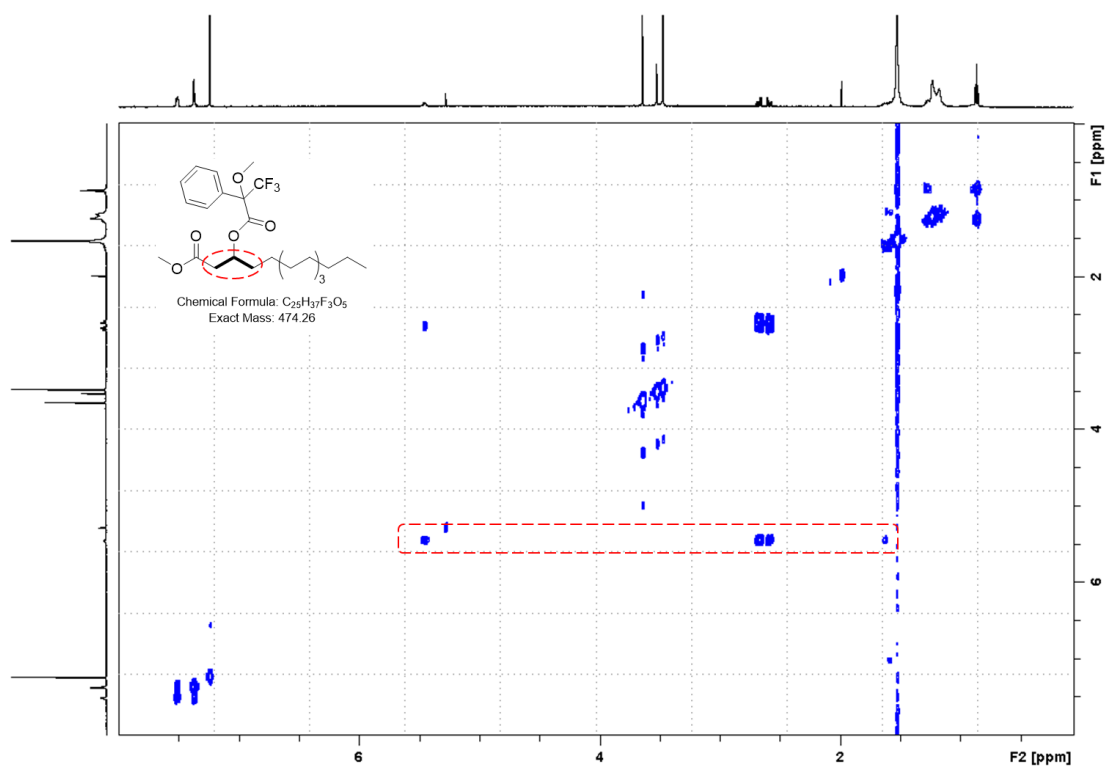

**Figure S33.** COSY spectrum of the (*R*)-MTPA ester (**1c**) in  $\text{CDCl}_3$ .

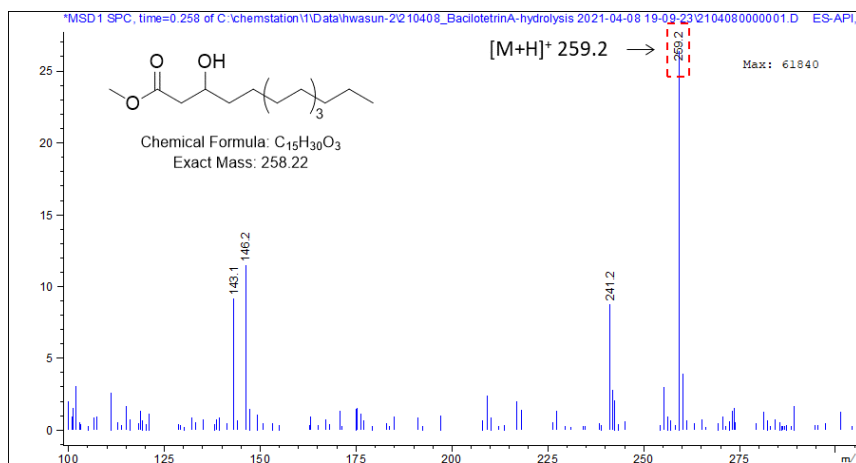

**Figure S34.** LR-EIMS spectrum of **1a**.

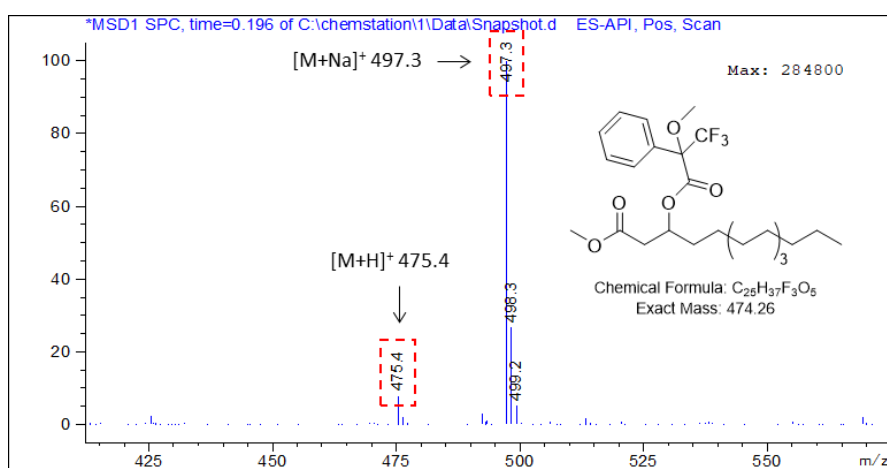

**Figure S35.** LR-EIMS spectrum of the (*S*)-MTPA ester (**1b**).

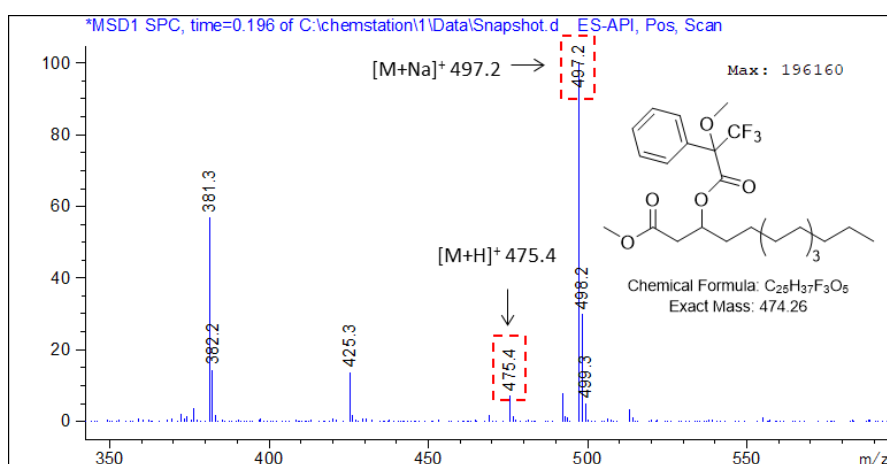

**Figure S36.** LR-EIMS spectrum of the (*R*)-MTPA ester (**1c**).

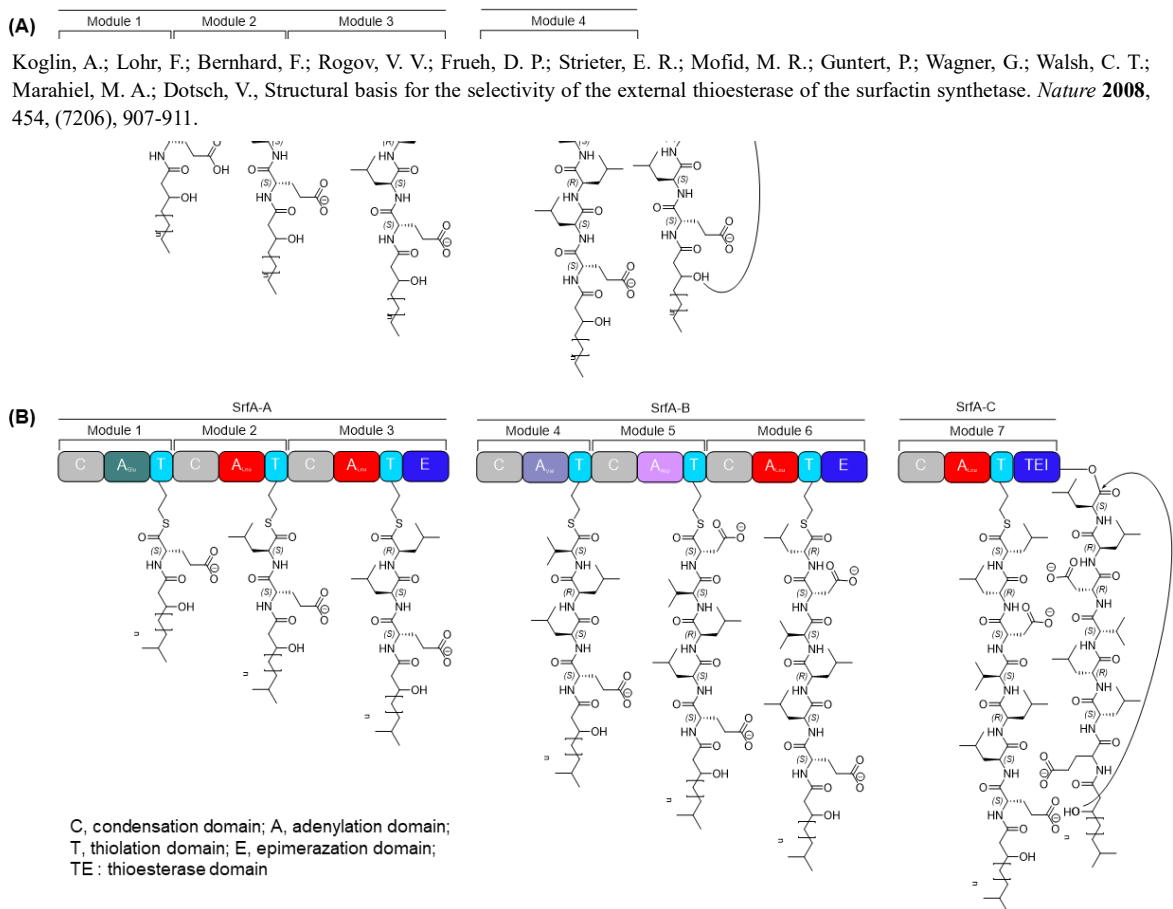

**Figure S37.** (A) Plausible biosynthetic pathway of compounds **1–3**; (B) biosynthetic pathway of surfactin.



**Table S4.**  $^1\text{H}$  and  $^{13}\text{C}$  NMR data for data for reported and revised bacilotetrin A (**4**) (500 MHz,  $\text{CD}_3\text{OD}$ )

| Reported bacilotetrin A ( <b>4</b> ) |                            |                                              | Revised bacilotetrin A ( <b>4</b> ) |                                                       |
|--------------------------------------|----------------------------|----------------------------------------------|-------------------------------------|-------------------------------------------------------|
| Position                             | $\delta_{\text{C}}$ , type | $\delta_{\text{H}}$ , m ( <i>J</i> in Hz)    | $\delta_{\text{C}}$ , type          | $\delta_{\text{H}}$ , m ( <i>J</i> in Hz)             |
| Glu                                  |                            |                                              |                                     |                                                       |
| 1                                    | 173.0, C                   |                                              | 175.9, C                            |                                                       |
| 2                                    | 51.6, CH                   | 4.58, m                                      | 55.6, CH                            | 4.10, m                                               |
| 3                                    | 35.5, $\text{CH}_2$        | 1.81, m                                      | 27.4, $\text{CH}_2$                 | 1.94, q (7.4)                                         |
| 4                                    | 31.5, $\text{CH}_2$        | 2.43, m                                      | 31.5, $\text{CH}_2$                 | 2.42, m                                               |
| 5                                    | 173.3, C                   |                                              | 176.0, C                            |                                                       |
| NH                                   |                            | 7.33, d (8.5) <sup>a</sup>                   |                                     | 8.42, d (4.5)                                         |
| Leu-1                                |                            |                                              |                                     |                                                       |
| 1                                    | 175.9, C                   |                                              | 173.9, C                            |                                                       |
| 2                                    | 55.5, CH                   | 4.11, t (7.5)                                | 54.9, CH                            | 3.75, m                                               |
| 3                                    | 40.7, $\text{CH}_2$        | 1.65 m                                       | 38.5, $\text{CH}_2$                 | 2.01, ddd (14.6, 11.0, 3.8)<br>1.80, o.l <sup>c</sup> |
| 4                                    | 26.4, CH                   | 1.68, m                                      | 26.28, CH                           | 1.60, o.l <sup>c</sup>                                |
| 5                                    | 21.8, $\text{CH}_3$        | 0.91, m                                      | 21.2, $\text{CH}_3$                 | 0.93, o.l <sup>c</sup>                                |
| 6                                    | 24.1, $\text{CH}_3$        | 0.95, m                                      | 24.0, $\text{CH}_3$                 | 0.94, o.l <sup>c</sup>                                |
| NH                                   |                            | 8.40, d (4.5) <sup>a</sup>                   |                                     | 9.11, d (6.7)                                         |
| Leu-2                                |                            |                                              |                                     |                                                       |
| 1                                    | 173.3, C                   |                                              | 174.5, C                            |                                                       |
| 2                                    | 54.9, CH                   | 3.75, dd (11.0, 4.0)                         | 53.3, CH                            | 4.42, ddd (12.1, 8.6, 3.6)                            |
| 3                                    | 38.6, $\text{CH}_2$        | 1.65, m                                      | 40.4, $\text{CH}_2$                 | 1.80, o.l <sup>c</sup>                                |
| 4                                    | 26.4 CH                    | 1.68, m                                      | 26.26, CH                           | 1.70, o.l <sup>c</sup>                                |
| 5                                    | 21.3, $\text{CH}_3$        | 0.91, m                                      | 21.3, $\text{CH}_3$                 | 0.89, o.l <sup>c</sup>                                |
| 6                                    | 23.9, $\text{CH}_3$        | 0.95, m                                      | 23.9, $\text{CH}_3$                 | 0.96, o.l <sup>c</sup>                                |
| NH                                   |                            | 9.10, d (6.5) <sup>b</sup>                   |                                     | 7.74, d (8.6)                                         |
| Leu-3                                |                            |                                              |                                     |                                                       |
| 1                                    | 174.6, C                   |                                              | 172.9, C                            |                                                       |
| 2                                    | 53.4, CH                   | 4.44, m                                      | 51.5, CH                            | 4.57, m                                               |
| 3                                    | 40.5, $\text{CH}_2$        | 1.65, m                                      | 40.5, $\text{CH}_2$                 | 1.80, o.l <sup>c</sup><br>1.69, o.l <sup>c</sup>      |
| 4                                    | 25.8, CH                   | 1.65, m                                      | 25.72, CH                           | 1.64, o.l <sup>c</sup>                                |
| 5                                    | 21.3, $\text{CH}_3$        | 0.91, m                                      | 21.8, $\text{CH}_3$                 | 0.91, o.l <sup>c</sup>                                |
| 6                                    | 23.9, $\text{CH}_3$        | 0.95, m                                      | 23.8, $\text{CH}_3$                 | 0.92, o.l <sup>c</sup>                                |
| NH                                   |                            | 7.43, d (9.5) <sup>b</sup>                   |                                     | 7.77, d (9.6)                                         |
| $\beta$ -OH acid                     |                            |                                              |                                     |                                                       |
| 1                                    | 173.0, C                   |                                              | 173.2, C                            |                                                       |
| 2                                    | 41.6, $\text{CH}_2$        | 2.73, dd (13.5, 4.5)<br>2.29, dd (14.0, 8.5) | 41.5, $\text{CH}_2$                 | 2.72, dd (13.8, 4.6)<br>2.29, dd (13.8, 8.1)          |
| 3                                    | 73.8, CH                   | 5.16, m                                      | 73.8, CH                            | 5.16, tt (7.8, 5.3)                                   |
| 4                                    | 40.4, $\text{CH}_2$        | 1.58, m                                      | 35.5, $\text{CH}_2$                 | 1.80, o.l <sup>c</sup><br>1.57, o.l <sup>c</sup>      |

**Table S4. Cont.**

| Reported bacilotetrin A (4) |                       |                                  | Revised bacilotetrin A (4) |                                  |
|-----------------------------|-----------------------|----------------------------------|----------------------------|----------------------------------|
| Position                    | $\delta_C$ , type     | $\delta_H$ , m ( <i>J</i> in Hz) | $\delta_C$ , type          | $\delta_H$ , m ( <i>J</i> in Hz) |
| $\beta$ -OH acid            |                       |                                  |                            |                                  |
| 5                           |                       |                                  |                            |                                  |
| 6                           |                       |                                  |                            |                                  |
| 7                           | 26.17 –               | 1.29, brs                        | 26.17 –                    | 1.28, o.l. <sup>c</sup>          |
| 8                           | 30.8, CH <sub>2</sub> |                                  | 30.8, CH <sub>2</sub>      |                                  |
| 9                           |                       |                                  |                            |                                  |
| 10                          |                       |                                  |                            |                                  |
| 11                          | 30.6, CH              | 1.50, m                          |                            |                                  |
| 12                          | 33.2, CH <sub>2</sub> | 1.29, brs                        | 33.1, CH <sub>2</sub>      | 1.29, o.l. <sup>c</sup>          |
| 13                          | 14.6, CH <sub>3</sub> | 0.89, m                          | 23.8, CH <sub>2</sub>      | 1.33, o.l. <sup>c</sup>          |
| 14                          | 23.9, CH <sub>3</sub> | 0.90, m                          | 14.5, CH <sub>3</sub>      | 0.89, o.l. <sup>c</sup>          |

<sup>a,b</sup>Chemical shifts and coupling constants were determined in CD<sub>3</sub>OH and DMSO, respectively.

<sup>c</sup>Signals were overlapped with other signals.
